# Supplementary material for: Validating Ellipsoid Zone Area Measurement With Multimodal Imaging in Choroideremia
Source: PubMed Central journal article supplement — Transl Vis Sci Technol. 2021 May 12;10(6):17. doi: 10.1167/tvst.10.6.17 (PMC8132016; doi:10.1167/tvst.10.6.17), 2021-05-12
Supplement: tvst-10-6-17_s001.pdf [file tvst-10-6-17_s001.pdf]

# Supplementary material

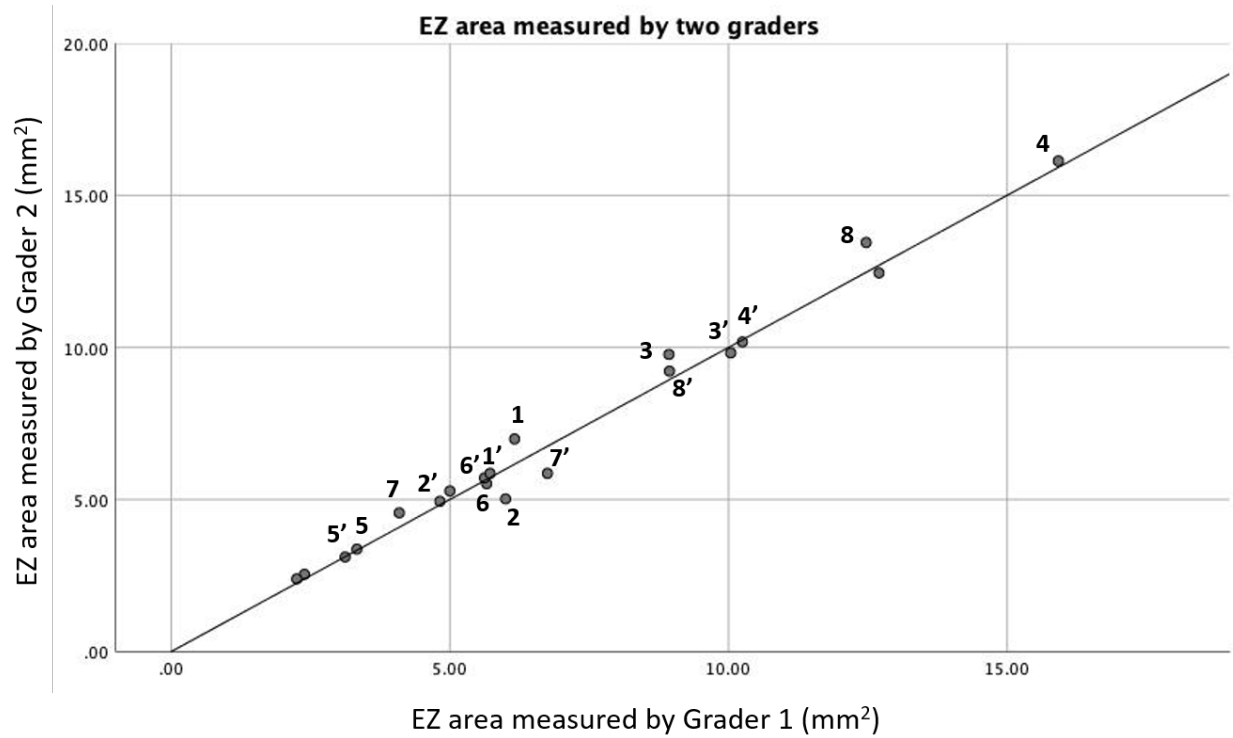

**Supplementary Figure 1.** A supplemental figure for Figure 3. Scatterplot of EZ area measured by two graders. The eight subjects ( $n = 1-8$ ) with both eyes included in this study are labeled. The measurements from right eyes are labeled as  $n$  and the measurements from left eyes are labeled as  $n'$ .

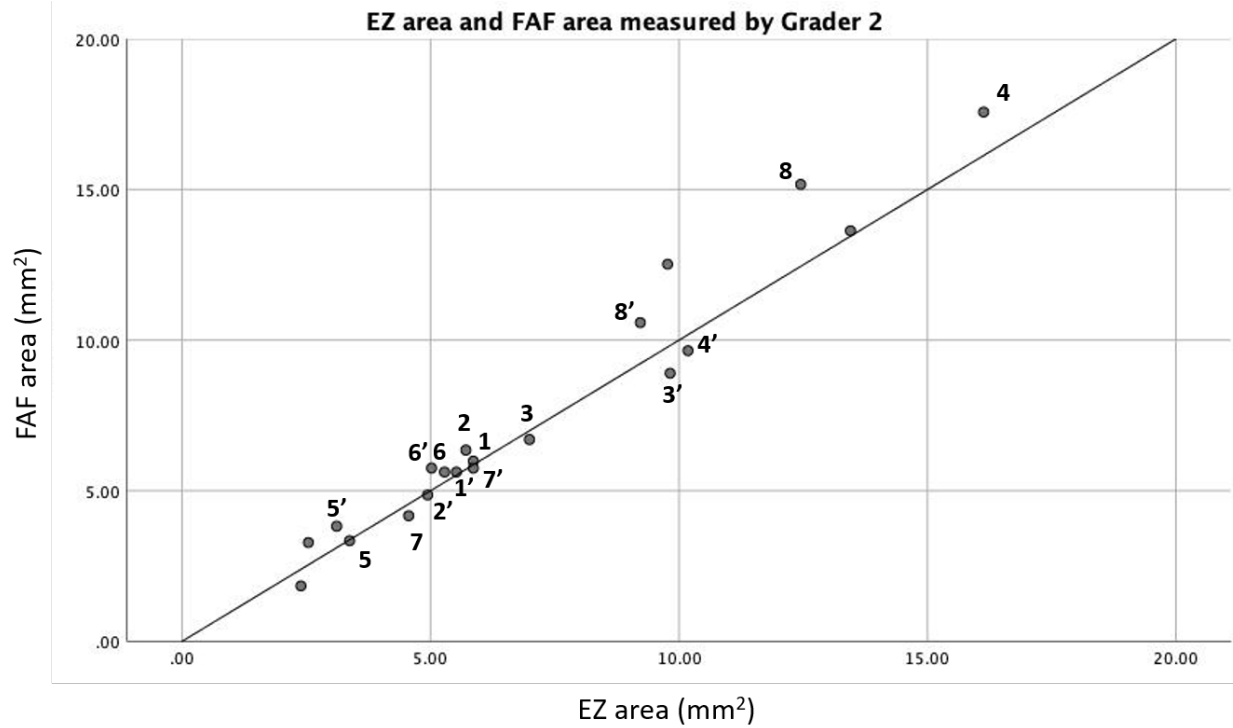

**Supplementary Figure 2.** A supplemental figure for Figure 5. Scatterplot of EZ area and FAF area measured by graders 2. The eight subjects ( $n = 1-8$ ) with both eyes included in this study are labeled. The measurements from right eyes are labeled as  $n$  and the measurements from left eyes are labeled as  $n'$ .

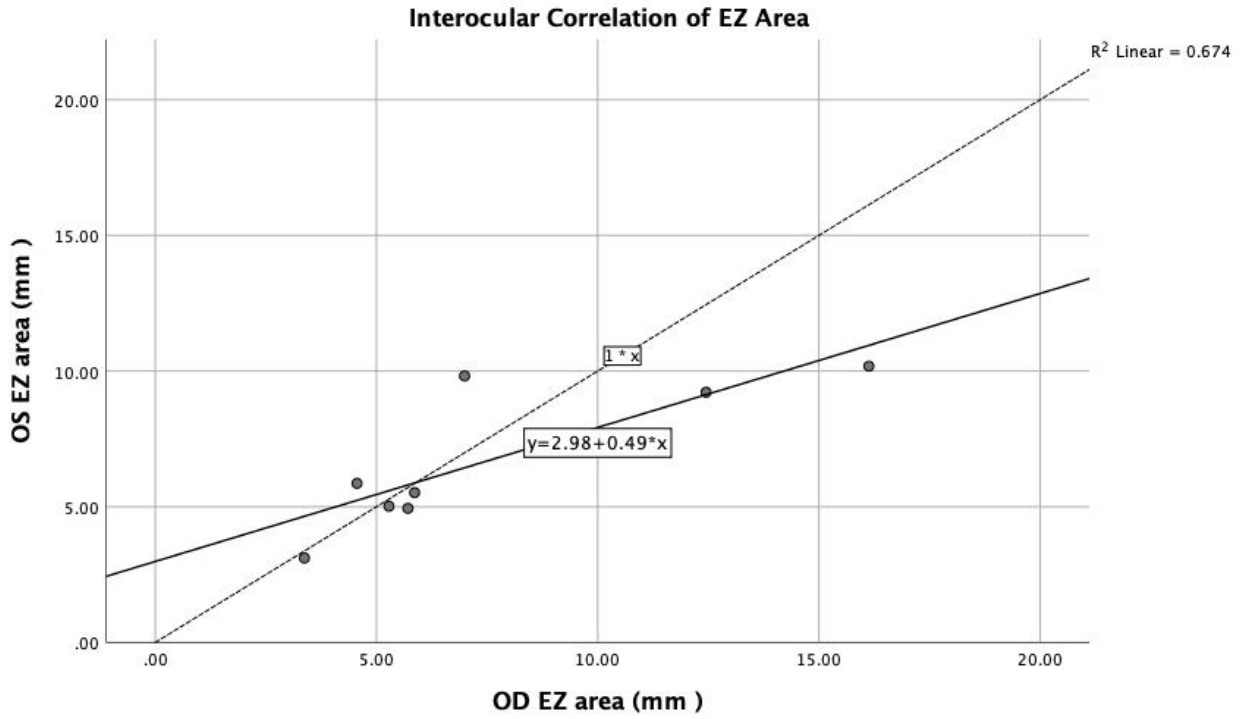

**Supplementary Figure 3.** significant interocular correlation in EZ area is presented ( $r = 0.821$ ,  $p = 0.012$ ) in the eight subjects ( $n = 1-8$ ) with both eyes included in this study.

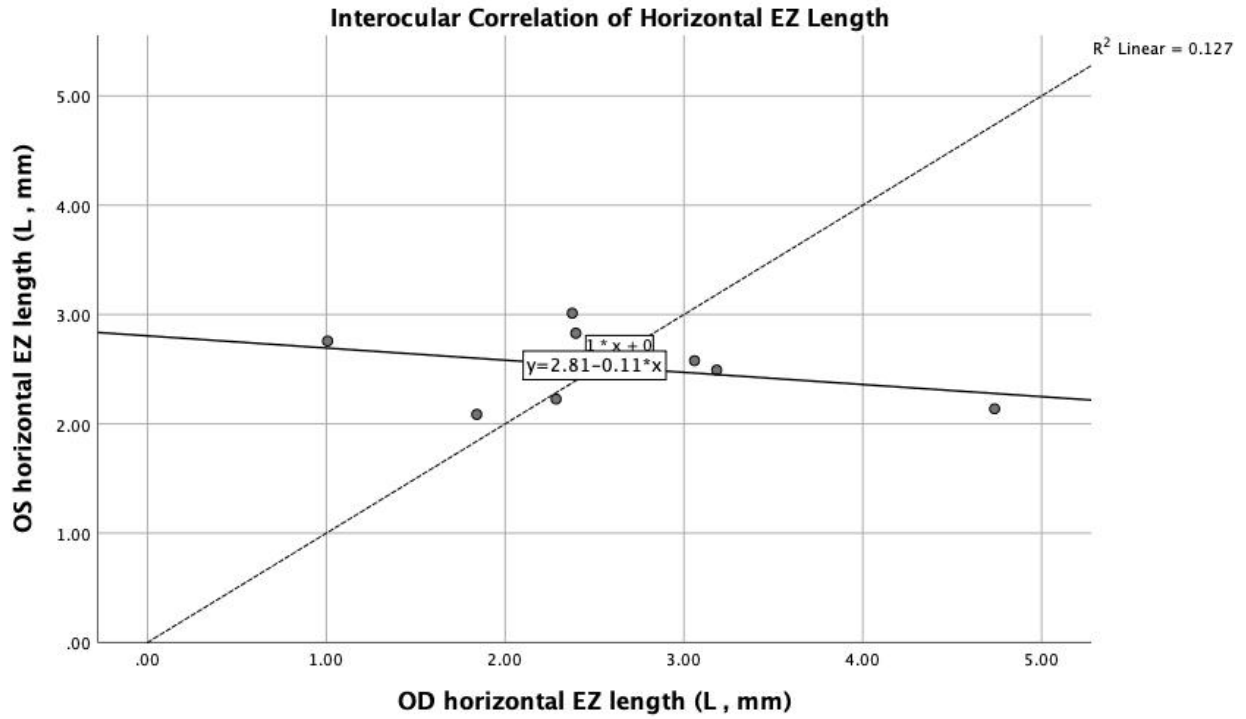

**Supplementary Figure 4.** No significant interocular correlation in horizontal EZ length is found ( $r = -0.357$ ,  $p = 0.386$ ) in the eight subjects ( $n = 1-8$ ) with both eyes included in this study.

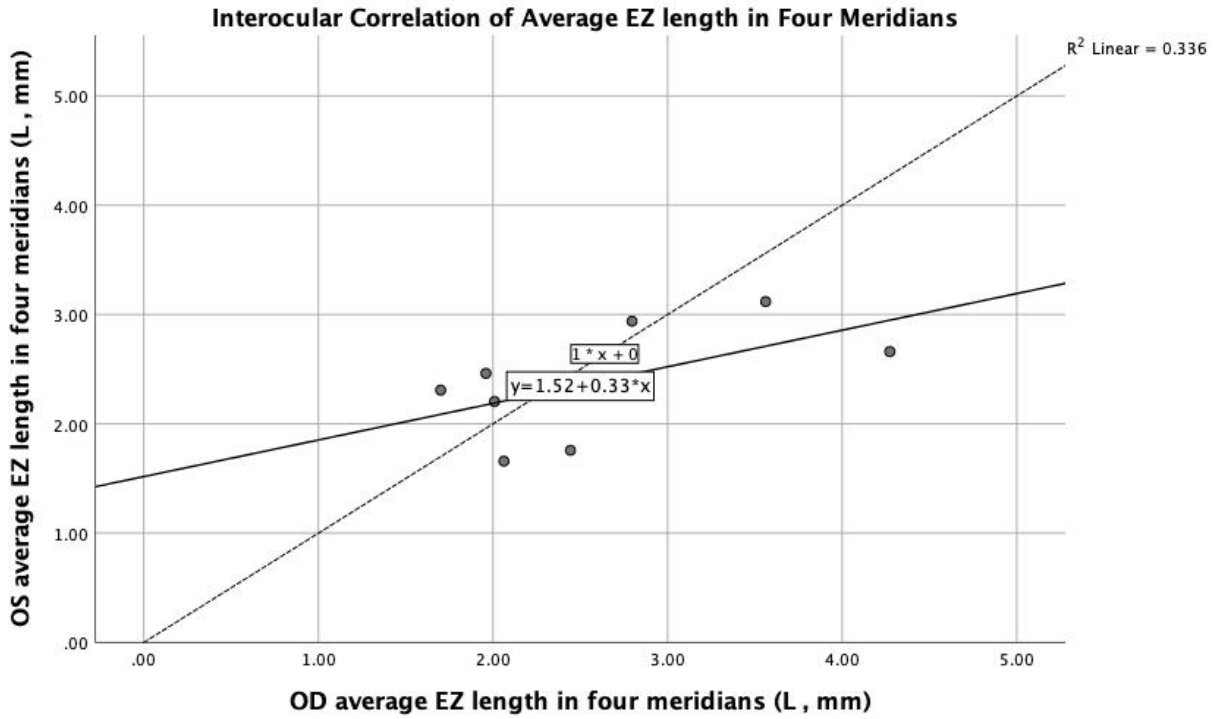

**Supplementary Figure 5.** No significant interocular correlation in average EZ length in four meridians is found ( $r = 0.579$ ,  $p = 0.132$ ) in the eight subjects ( $n = 1-8$ ) with both eyes included in this study.
